# Supplementary material for: The Economic Impact of Originator-to-Biosimilar Non-medical Switching in the Real-World Setting: A Systematic Literature Review
Source: PubMed Central journal article supplement — Adv Ther. 2021 Nov 15;39(1):455–87. doi: 10.1007/s12325-021-01951-z (PMC8799532; doi:10.1007/s12325-021-01951-z), 2021-11-15
Supplement: 12325_2021_1951_MOESM1_ESM.pdf [file 12325_2021_1951_MOESM1_ESM.pdf]

# **The Economic Impact of Originator-To-Biosimilar Non-medical Switching in the Real-World Setting: A Systematic Literature Review**

**Authors:** Erin Hillhouse, PhD<sup>1</sup>, Karine Mathurin, MSc<sup>1,2</sup>, Joëlle Bibeau, MSc<sup>1</sup>, Diana Parison<sup>3</sup>, Yasmine Rahal<sup>3</sup>, Jean Lachaine, PhD<sup>1,2</sup>, Catherine Beauchemin, PhD<sup>1,2</sup>.

1. PeriPharm Inc., Montreal, Quebec, Canada;
2. University of Montreal, Montreal, Quebec, Canada;
3. AbbVie Corporation, St-Laurent, Quebec, Canada.

\*Corresponding author:

Catherine Beauchemin, PhD  
Peripharm  
485 McGill St. Suite 910  
Montreal, Quebec, H2Y 2H4  
Canada  
Phone: 514-731-8207 ext. 102  
Cell: 514- 506-4798  
Email: [catherine.beauchemin@peripharm.com](mailto:catherine.beauchemin@peripharm.com)

## Appendix 1. Search strategy

### Search Conducted 03-03-2020

#### Embase 1974 to 2020 March 02, Database Field Guide All Ovid MEDLINE(R) 1946 to Present

|           |                                                                                                           |                |
|-----------|-----------------------------------------------------------------------------------------------------------|----------------|
| 1         | biosimilar\$.tw.                                                                                          | 9732           |
| 2         | *Biosimilar Pharmaceuticals/                                                                              | 3432           |
| 3         | originator\$.ab,ti.                                                                                       | 3740           |
| <b>4</b>  | <b>or/1-3</b>                                                                                             | <b>11924</b>   |
| 5         | Epidemiologic Studies/                                                                                    | 215252         |
| 6         | exp Cohort Studies/                                                                                       | 2516974        |
| 7         | Cross-Sectional Studies/                                                                                  | 529486         |
| 8         | (epidemiologic adj (study or studies)).tw.                                                                | 57231          |
| 9         | (cohort adj (study or studies)).tw.                                                                       | 476236         |
| 10        | cross sectional.ab,ti.                                                                                    | 773178         |
| 11        | cohort analy\$.ab,ti.                                                                                     | 19849          |
| 12        | (follow up adj (study or studies)).ab,ti.                                                                 | 110205         |
| 13        | longitudinal.ab,ti.                                                                                       | 550776         |
| 14        | prospective\$.ab,ti.                                                                                      | 1716761        |
| 15        | (observ\$ adj3 (study or studies)).ab,ti.                                                                 | 465107         |
| 16        | (pragmatic clinical trial or pragmatic trial).mp.                                                         | 3713           |
| 17        | (real world or real*world).ab,ti.                                                                         | 102582         |
| 18        | (real life or real*life).ab,ti.                                                                           | 48402          |
| 19        | (observational adj (study or studies)).tw.                                                                | 259236         |
| 20        | *Retrospective Studies/                                                                                   | 17291          |
| 21        | phase IV.mp.                                                                                              | 7416           |
| 22        | *Pharmacovigilance/ or *Product Surveillance, Postmarketing/ or *Adverse Drug Reaction Reporting Systems/ | 23317          |
| 23        | (adherence adj3 (study or studies)).tw.                                                                   | 10691          |
| 24        | (persistence adj3 (study or studies)).tw.                                                                 | 3442           |
| 25        | (compliance adj3 (study or studies)).tw.                                                                  | 7166           |
| 26        | *drug surveillance programme/                                                                             | 12597          |
| 27        | Longitudinal study/                                                                                       | 267851         |
| 28        | Prospective study/                                                                                        | 1115090        |
| <b>29</b> | <b>or/5-28</b>                                                                                            | <b>5654515</b> |
| 30        | *health care utilization/                                                                                 | 45499          |
| 31        | *Health Resources/                                                                                        | 38508          |
| 32        | *Health Care Costs/                                                                                       | 52077          |
| 33        | *"Length of Stay"/ or *Hospitalization/                                                                   | 93389          |

|           |                                                                                                                                                                                                                                                                                                                                                         |                |
|-----------|---------------------------------------------------------------------------------------------------------------------------------------------------------------------------------------------------------------------------------------------------------------------------------------------------------------------------------------------------------|----------------|
| 34        | (health system utili*ation or "health system use" or medical system utili*ation or "medical system use" or Medical care expenditures or Medical expenditures or Health care expenditures or Healthcare expenditures or Health expenditures or resource\$ utili*ation or "resource\$ use" or "healthcare use" or "health care use" or "medical use").mp. | 92091          |
| 35        | Economics/                                                                                                                                                                                                                                                                                                                                              | 263787         |
| 36        | exp "Costs and Cost Analysis"/                                                                                                                                                                                                                                                                                                                          | 576184         |
| 37        | Economics, Nursing/                                                                                                                                                                                                                                                                                                                                     | 34620          |
| 38        | Economics, Medical/                                                                                                                                                                                                                                                                                                                                     | 40574          |
| 39        | Economics, Pharmaceutical/                                                                                                                                                                                                                                                                                                                              | 10154          |
| 40        | exp Economics, Hospital/                                                                                                                                                                                                                                                                                                                                | 854916         |
| 41        | (economic* or cost or costs or costly or costing or price or prices or pricing or pharmaco-economic* or pharmaco-economic* or expenditure or expenditures or expense or expenses or financial or finance or finances or financed).ti,kf.                                                                                                                | 459156         |
| 42        | (economic* or cost or costs or costly or costing or price or prices or pricing or pharmaco-economic* or pharmaco-economic* or expenditure or expenditures or expense or expenses or financial or finance or finances or financed).ab. /freq=2                                                                                                           | 669362         |
| 43        | (cost* adj2 (effective* or utilit* or benefit* or minimi* or analy* or outcome or outcomes)).ab,kf.                                                                                                                                                                                                                                                     | 370201         |
| 44        | "cost"/ or "health care cost"/ or *economic aspect/                                                                                                                                                                                                                                                                                                     | 91486          |
| 45        | *Health Services/                                                                                                                                                                                                                                                                                                                                       | 66201          |
| 46        | saving\$.ab,ti.                                                                                                                                                                                                                                                                                                                                         | 159380         |
| 47        | or/30-46                                                                                                                                                                                                                                                                                                                                                | 2130206        |
| <b>48</b> | <b>29 or 47</b>                                                                                                                                                                                                                                                                                                                                         | <b>7468699</b> |
| 49        | *drug substitution/                                                                                                                                                                                                                                                                                                                                     | 2007           |
| 50        | Switch*.mp. [mp=ti, ab, hw, tn, ot, dm, mf, dv, kw, fx, dq, nm, kf, ox, px, rx, ui, sy]                                                                                                                                                                                                                                                                 | 367594         |
| 51        | substitut*.mp. [mp=ti, ab, hw, tn, ot, dm, mf, dv, kw, fx, dq, nm, kf, ox, px, rx, ui, sy]                                                                                                                                                                                                                                                              | 889996         |
| 52        | change.ab,ti.                                                                                                                                                                                                                                                                                                                                           | 2358332        |
| 53        | launch*.ab,ti.                                                                                                                                                                                                                                                                                                                                          | 62413          |
| 54        | alternative\$.ab,ti.                                                                                                                                                                                                                                                                                                                                    | 1337096        |
| 55        | management.ab,ti.                                                                                                                                                                                                                                                                                                                                       | 2538057        |
| <b>56</b> | <b>or/49-55</b>                                                                                                                                                                                                                                                                                                                                         | <b>7063944</b> |
| <b>57</b> | <b>4 and 48 and 56</b>                                                                                                                                                                                                                                                                                                                                  | <b>2366</b>    |
| 58        | remove duplicates from 57                                                                                                                                                                                                                                                                                                                               | 1850           |
|           | <b>Imported</b>                                                                                                                                                                                                                                                                                                                                         | <b>1845</b>    |
|           | <b>Discard duplicates</b>                                                                                                                                                                                                                                                                                                                               | <b>5</b>       |

## **Appendix 2. Conference websites included in search**

American College of Rheumatology Annual Meeting (ACR/ARHP)  
American College of Gastroenterology  
Annual Scientific Meeting (ACG)  
American Diabetes Association Scientific Sessions (ADA)  
American Society of Hematology Annual Meeting (ASH)  
American Thoracic Society International Conferences (ATS)  
Annual Meeting of the European Association for the Study of Diabetes (EASD)  
American Society of Clinical Oncology Annual Meeting (ASCO)  
European League Against Rheumatism Annual Congress (EULAR)  
European Congress of Endocrinology (ECE)  
European Society of Cardiology Annual Congress (ESC)  
European Crohn's and Colitis Organization Annual Congress (ECCO gastro)  
International Society for Pharmacoeconomics and Outcomes Research Annual European  
Congress (ISPOR Europe)  
International Society for Pharmacoeconomics and Outcomes Research Annual International  
Meeting (ISPOR International)  
Scientific Sessions of American Heart Association (AHA)  
European Cancer Congress (ECCO cancer)

**Supplementary Table 1. Data extracted**

| Subject of Data         | Data Extracted                                                                                                                                                                                                                                                                                                                                                                                                                                                                                                                           |
|-------------------------|------------------------------------------------------------------------------------------------------------------------------------------------------------------------------------------------------------------------------------------------------------------------------------------------------------------------------------------------------------------------------------------------------------------------------------------------------------------------------------------------------------------------------------------|
| Publication information | <ul style="list-style-type: none"> <li>• first author's name</li> <li>• year of publication</li> <li>• country</li> </ul>                                                                                                                                                                                                                                                                                                                                                                                                                |
| Drug information        | <ul style="list-style-type: none"> <li>• Drug name</li> <li>• Originator brand name</li> <li>• Biosimilar brand name</li> </ul>                                                                                                                                                                                                                                                                                                                                                                                                          |
| Study Design            | <ul style="list-style-type: none"> <li>• Study type</li> <li>• Patient data source</li> <li>• Study period</li> <li>• Patient follow-up</li> <li>• Outcomes</li> <li>• Implementation of switch programme</li> </ul>                                                                                                                                                                                                                                                                                                                     |
| Study Population        | <ul style="list-style-type: none"> <li>• Disease area</li> <li>• Patient eligibility criteria</li> <li>• Sample size</li> <li>• Biologic-to-biosimilar switch rate</li> <li>• Biosimilar discontinuation rate</li> <li>• Reasons for discontinuation</li> <li>• Time to discontinuation</li> <li>• Biosimilar to alternative biologic switch rate</li> <li>• Biosimilar-to-biologic switch-back rate</li> <li>• Subsequent treatment list</li> <li>• Subsequent treatment rate</li> <li>• Treatment adherence and persistence</li> </ul> |
| Cost and/or HCRU input  | <ul style="list-style-type: none"> <li>• Costing data source</li> <li>• Cost and/or HCRU inputs considered</li> <li>• Assumptions</li> <li>• Cost year</li> <li>• Currency</li> </ul>                                                                                                                                                                                                                                                                                                                                                    |
| Efficacy outcomes       | <ul style="list-style-type: none"> <li>• Dose escalation or de-escalation</li> <li>• Events</li> <li>• PROs</li> <li>• Additional treatment</li> </ul>                                                                                                                                                                                                                                                                                                                                                                                   |
| Cost outcomes           | <ul style="list-style-type: none"> <li>• Indirect costs/productivity loss</li> <li>• Cost differences between biosimilars and originators</li> </ul>                                                                                                                                                                                                                                                                                                                                                                                     |

---

|                                |                                                                                                                                                                                                                                                                                |
|--------------------------------|--------------------------------------------------------------------------------------------------------------------------------------------------------------------------------------------------------------------------------------------------------------------------------|
| Safety outcomes including HCRU | <ul style="list-style-type: none"><li>• Medical visits</li><li>• Phone consultation</li><li>• Hospitalization</li><li>• Emergency room [ER] visits</li><li>• Imaging</li><li>• Laboratory tests (number and values)</li><li>• Surgery</li><li>• Adverse events [AEs]</li></ul> |
|--------------------------------|--------------------------------------------------------------------------------------------------------------------------------------------------------------------------------------------------------------------------------------------------------------------------------|

---

**HCRU**: healthcare resource utilization; **PRO**: patient-reported outcome.

**Supplementary Table 2. Reported characteristics associated with biosimilar discontinuation**

| Disease                 | Citation                          | Drug       | Dose Escalation Rate                             | Discontinuation Rate                 | TTD                                      | Reason for Discontinuation                                                                                                           | Switch Back Rate | Switch to Alternative Biologic Rate | Subsequent Treatment                             |
|-------------------------|-----------------------------------|------------|--------------------------------------------------|--------------------------------------|------------------------------------------|--------------------------------------------------------------------------------------------------------------------------------------|------------------|-------------------------------------|--------------------------------------------------|
| <b>Gastroenterology</b> |                                   |            |                                                  |                                      |                                          |                                                                                                                                      |                  |                                     |                                                  |
| CD                      | Ala 2016 <sup>50</sup>            | Infliximab | NR                                               | 4/20 (20%)                           | NR                                       | Disease activity: 3<br>Remission: 1                                                                                                  | NR               | 3/20 (15%)                          | Adalimumab: 2<br>Allopurinol/<br>Azathioprine: 1 |
| CD                      | Plevris 2019 <sup>45</sup>        | Infliximab | 5.5%                                             | 17/110 (15.5%)                       | NR                                       | Pregnancy: 3<br>Patient choice: 2<br>Disease activity: 2<br>Surgery: 1<br>Remission: 1<br>Patient relocated: 1<br>AEs: 7             | NR               | 1/110 (0.9%)                        | Vedolizumab: 1                                   |
| CD, UC                  | Bergqvist 2018 <sup>51</sup>      | Infliximab | 64/250 (25.6%)<br>Dose reduction: 31/250 (12.4%) | 48/313 (15.3%)                       | NR                                       | Remission: 10<br>Disease activity: 23<br>AEs: 15                                                                                     | NR               | NR                                  | NR                                               |
| CD, UC                  | Diaz Hernandez 2016 <sup>52</sup> | Infliximab | NR                                               | 3/72 (4.2%)                          | NR                                       | Primary non-response: 1<br>LOR: 2                                                                                                    | NR               | NR                                  | NR                                               |
| CD, UC                  | Fischer 2018 <sup>53</sup>        | Infliximab | NR                                               | 12/114 (10.5%)                       | NR                                       | AEs: 6<br>LOR: 16                                                                                                                    | NR               | NR                                  | NR                                               |
| CD, UC                  | Guerra Veloz 2019 <sup>54</sup>   | Infliximab | 22/100 (22%)                                     | CD: 16/64 (25%)<br>UC: 12/36 (33.3%) | Median 15 months<br>Range 8-24           | CD patients<br>LOR: 10<br>AEs: 2<br>Remission: 3<br>Switch to alternative drug: 1<br>UC patients<br>LOR: 5<br>AEs: 2<br>Remission: 5 | NR               | 1/100 (1%)                          | Adalimumab: 1                                    |
| CD, UC                  | Hoivik 2018 <sup>55</sup>         | Infliximab | NR                                               | 12/143 (8.4%)                        | NR                                       | LOR: 3<br>AEs: 4<br>Remission: 5                                                                                                     | NR               | 4/143 (2.8%)                        | Vedolizumab                                      |
| CD, UC                  | Rodriguez Glez 2017 <sup>56</sup> | Infliximab | 10/72 (13.9%)                                    | 7/72 (9.7%)                          | NR                                       | LOR: 4                                                                                                                               | NR               | NR                                  | NR                                               |
| CD, UC                  | Sieczkowska 2016 <sup>57</sup>    | Infliximab | NR                                               | 15/39 (38.5%)                        | NR                                       | Remission: 3<br>LOR: 3<br>Infusion reaction: 1<br>AE: 3<br>Finances: 5                                                               | NR               | 2/39 (5.1%)                         | Adalimumab: 2                                    |
| CD, UC                  | St Clair Jones 2017 <sup>39</sup> | Infliximab | 8/71 (11.3%)<br>Dose reduction: 6/71 (8.5%)      | 17/71 (23.9%)                        | NR                                       | Switch to alternative drug: 8<br>Antibodies: 7<br>LOR: 2                                                                             | NR               | 8/71 (11.3%)                        | Adalimumab: 4<br>Golimumab: 3<br>Vedolizumab: 1  |
| pediatric CD, UC        | Kang 2017 <sup>58</sup>           | Infliximab | 3/38 (7.9%)                                      | 1/38 (2.6%)                          | NR                                       | Remission: 1                                                                                                                         | NR               | NR                                  | NR                                               |
| CD, UC, IBDU            | Huoponen 2020 <sup>35</sup>       | Infliximab | NR                                               | 3/54 (5.6%)                          | NR                                       | Switch to alternative drug: 1<br>Remission: 1<br>Trough levels: 1                                                                    | NR               | 1/54 (1.9%)                         | NR                                               |
| CD, UC, IBDU            | Smits 2017 <sup>59</sup>          | Infliximab | 19%<br>Dose reduction: 8%                        | 15/83 (18.1%)                        | Median 16 weeks<br>(Range 0 to 36 weeks) | Remission: 1<br>AEs: 5<br>LOR: 2<br>Antibodies: 4<br>Arthralgia: 1                                                                   | NR               | NR                                  | NR                                               |

| Disease             | Citation                        | Drug       | Dose Escalation Rate                                                                                      | Discontinuation Rate | TTD                             | Reason for Discontinuation                                                                                      | Switch Back Rate | Switch to Alternative Biologic Rate                                                               | Subsequent Treatment                                    |
|---------------------|---------------------------------|------------|-----------------------------------------------------------------------------------------------------------|----------------------|---------------------------------|-----------------------------------------------------------------------------------------------------------------|------------------|---------------------------------------------------------------------------------------------------|---------------------------------------------------------|
|                     |                                 |            |                                                                                                           |                      |                                 | Lost to follow-up: 2                                                                                            |                  |                                                                                                   |                                                         |
| CD, UC, IBDU        | Razanskaite 2017 <sup>44</sup>  | Infliximab | NR                                                                                                        | 41/143 (28.7%)       | NR                              | Elective withdrawal: 11<br>Primary non-response: 4<br>LOR: 12<br>Pregnancy: 1<br>AEs: 12<br>Patient's choice: 1 | 2/143 (1.4%)     | NR                                                                                                | NR                                                      |
| CD, FCD, UC         | Park 2015 <sup>60</sup>         | Infliximab | 27/60 (45%)                                                                                               | 3/60 (5.0%)          |                                 | Infusion reaction: 1<br>AEs: 2                                                                                  | NR               | NR                                                                                                | NR                                                      |
| LCD, FCD, UC, IBDU  | Ratnakumaran 2018 <sup>61</sup> | Infliximab | Switch vs Non-switch, increase in:<br>Dose: 10.6% vs 25%<br>Frequency: 19.1% vs 12.5%<br>Both: 12.8% v 0% | 36/191 (18.8%)       |                                 | AEs: 9<br>Surgery: 5<br>Switched to alternative drug: 15<br>Other: 6<br>Patient's choice: 1                     | 1/191 (0.5%)     | 15/191 (7.9%)                                                                                     | NR                                                      |
| NS                  | Gervais 2018 <sup>62</sup>      | Infliximab | 16/33 (48.5%)                                                                                             | 4/33 (12.1%)         | Mean 6.5 months (3 to 9 months) | LOR: 1<br>Transitioned to adult services: 1<br>Remission: 2                                                     | NR               | 1/33 (3.0%)                                                                                       | Adalimumab: 1                                           |
| <b>Rheumatology</b> |                                 |            |                                                                                                           |                      |                                 |                                                                                                                 |                  |                                                                                                   |                                                         |
| RA                  | Dyball 2017 <sup>63</sup>       | Etanercept | NR                                                                                                        | 6/36 (16.7%)         | NR                              | Infusion reaction: 1<br>AEs: 1<br>LOR: 4                                                                        | 5/36 (13.9%)     | NR                                                                                                | NR                                                      |
| RA                  | Peral 2018 <sup>37</sup>        | Etanercept | NR                                                                                                        | NR                   | NR                              | NR                                                                                                              | NR               | 18.20%                                                                                            | Adalimumab : 1<br>Tocilizumab : 1<br>Abatacept : 1      |
| RA                  | Shah 2018 <sup>43</sup>         | Etanercept | NR                                                                                                        | NR                   | NR                              | AEs: 5<br>Difficulty with the autoinjector pen: 3<br>Disease activity: 2.                                       | 8/151 (5.3%)     | NR                                                                                                | NR                                                      |
| RA                  | Tarallo 2019 <sup>32</sup>      | Etanercept | NR                                                                                                        | 332/1,259 (26.4%)    | NR                              | NR                                                                                                              | 105/1,259 (8.3%) | 179/1,259 (14.2%) to alternative biologic<br>48/1,259 (3.8%) to alternative etanercept biosimilar | Abatacept<br>Adalimumab<br>Tocilizumab<br>SB4 or GP2015 |
| RA                  | Nisar 2019 <sup>42</sup>        | Rituximab  | NR                                                                                                        | 6/40 (15%)           | NR                              | AEs : 6                                                                                                         | 4/40 (10%)       | 1/40 (2.5%)                                                                                       | Humira                                                  |
| RA, PsA, AS         | Alkoky 2018 <sup>71</sup>       | Etanercept | NR                                                                                                        | NR                   | NR                              | NR                                                                                                              | 14/158 (8.9%)    | NR                                                                                                | NR                                                      |
| RA, PsA, AS         | Chan 2019 <sup>41</sup>         | Etanercept | NR                                                                                                        | NR                   | NR                              | Disease activity<br>Intolerance                                                                                 | 4/113 (3.5%)     | 3/113 (2.7%)                                                                                      | NR                                                      |
| RA, PsA, AS         | Ma 2018 <sup>65</sup>           | Etanercept | NR                                                                                                        | 8/50 (16%)           | NR                              | AEs: 4<br>Disease activity: 3<br>New contraindication: 1                                                        | NR               | NR                                                                                                | NR                                                      |



| Disease                                                              | Citation                             | Drug       | Dose Escalation Rate                                                                                                 | Discontinuation Rate | TTD                  | Reason for Discontinuation                                                                       | Switch Back Rate | Switch to Alternative Biologic Rate | Subsequent Treatment                                   |
|----------------------------------------------------------------------|--------------------------------------|------------|----------------------------------------------------------------------------------------------------------------------|----------------------|----------------------|--------------------------------------------------------------------------------------------------|------------------|-------------------------------------|--------------------------------------------------------|
| RA, PsA, AS                                                          | Nascimento Junior 2018 <sup>66</sup> | Infliximab | NR                                                                                                                   | 5/78 (6.4%)          | NR                   | LOR: 4<br>Loss to follow-up: 1                                                                   | NR               | NR                                  | NR                                                     |
| RA, PsA, AS, JIA                                                     | Nisar 2019 <sup>42</sup>             | Etanercept | NR                                                                                                                   | 6/82 (7.3%)          | Range 3 to 10 months | AEs and disease worsening: 4 uncontrolled<br>Disease activity: 2                                 | 4/82 (4.9%)      | 2/82 (2.4%)                         | NR                                                     |
| RA, PsA, SpA                                                         | Uke 2019 <sup>72</sup>               | Etanercept | NR                                                                                                                   | NR                   | NR                   | Personal reasons: 6<br>Disease activity: 11                                                      | 17/157 (10.8%)   | NR                                  | NR                                                     |
| RA, PsA, SpA                                                         | Valido 2019 <sup>67</sup>            | Infliximab | NR                                                                                                                   | 5/60 (8.3%)          | NR                   | disease activity: 3<br>AE: 1                                                                     | 1/60 (1.7%)      | 3/60 (5.0%)                         | NR                                                     |
| NS                                                                   | Ahmad 2019 <sup>68</sup>             | Etanercept | NR                                                                                                                   | 11/104 (10.6%)       | NR                   | Disease activity: 11                                                                             | 2/104 (1.9%)     | 9/104 (8.7%)                        | Adalimumab<br>Certolizumab<br>Tocilizumab<br>Rituximab |
| NS                                                                   | Sheppard 2016 <sup>73</sup>          | Infliximab | NR                                                                                                                   | NR                   | NR                   | AEs: 4                                                                                           | 4/25 (16%)       | NR                                  | NR                                                     |
| <b>Hepatology</b>                                                    |                                      |            |                                                                                                                      |                      |                      |                                                                                                  |                  |                                     |                                                        |
| Chronic kidney disease                                               | Minutolo 2017 <sup>8</sup>           | ESA        | 17.2% vs 3.7% (no switch)<br><br>Dose increased by a mean of 39.6%<br><br>Dose reduction: 21.5% vs 45.4% (no switch) | NR                   | NR                   | NR                                                                                               | NR               | NR                                  | NR                                                     |
| <b>Growth Development</b>                                            |                                      |            |                                                                                                                      |                      |                      |                                                                                                  |                  |                                     |                                                        |
| GHD, TS, CRI, PWS children born small for gestational age            | Flodmark 2013 <sup>7</sup>           | Somatropin | NR                                                                                                                   | NR                   | NR                   | NR                                                                                               | 6/98 (6.1%)      | NR                                  | NR                                                     |
| <b>Unspecified or Multiple Disease Areas</b>                         |                                      |            |                                                                                                                      |                      |                      |                                                                                                  |                  |                                     |                                                        |
| IBD, RA, PsA, AS                                                     | Abdalla 2017 <sup>69</sup>           | Infliximab | NR                                                                                                                   | 5/34 (14.7%)         | NR                   | Pregnancy: 1<br>LOR: 2<br>AEs: 1<br>Disease activity: 1                                          | 1/34 (2.9%)      | 3/34 (8.8%)                         | NR                                                     |
| CD, UC, RA, AS                                                       | Ramos Rodriguez 2018 <sup>74</sup>   | Infliximab | 1/48 (2.1%)                                                                                                          | NR                   | NR                   | NR                                                                                               | NR               | NR                                  | NR                                                     |
| NS (areas include rheumatology, gastroenterology, internal medicine) | Gutermann 2017 <sup>70</sup>         | Infliximab | NR                                                                                                                   | 39/267 (14.6%)       | NR                   | LOR: 30<br>AE: 1<br>Lost to follow-up: 2<br>Medical reason: 2<br>Switched to alternative drug: 4 | 31/267 (11.6%)   | 4/267 (1.5%)                        | NR                                                     |

| Disease                 | Citation                    | Drug       | Dose Escalation Rate | Discontinuation Rate                                                    | TTD | Reason for Discontinuation | Switch Back Rate                 | Switch to Alternative Biologic Rate | Subsequent Treatment |
|-------------------------|-----------------------------|------------|----------------------|-------------------------------------------------------------------------|-----|----------------------------|----------------------------------|-------------------------------------|----------------------|
| NS (RA, AS most common) | Phillips 2017 <sup>36</sup> | Infliximab | NR                   | <i>Switchers vs non-switchers</i><br>13.2 vs 1.52 per 1000 person-years | NR  | NR                         | 79% of patients who discontinued | NR                                  | NR                   |

**AEs:** adverse events, **AS:** axial spondylarthritis, **CD:** Crohn's disease, **CRI:** chronic renal insufficiency, **ESA:** Erythropoiesis-stimulating agent; **FCD:** fistulizing Crohn's disease, **GHD:** growth hormone deficiency, **IBD:** inflammatory bowel disease, **IBDU:** inflammatory bowel disease unclassified, **JIA:** juvenile idiopathic arthritis, **LCD:** luminal Crohn's disease, **LOR:** loss of response, **NR:** not reported, **NS:** not specified, **PsA:** psoriatic arthritis, **PWS:** Prader-Willi Syndrome, **RA:** rheumatoid arthritis, **SpA:** spondylarthritis, **TS:** Turner Syndrome, **TTD:** time to discontinuation, **UC:** ulcerative colitis.
